# Supplementary material
Source: HighWire-hosted journal article supplement (https://bmjopen.bmj.com/content/15/3/e092244)
Supplement: inline-supplementary-material-1 [file inline-supplementary-material-1.pdf]

Additional File 1: Directory of consulted sources for ethics committees, last edited on 27.07.2023

| Country    | Source provided by a national organization                                                                                                                                                                                    | Source provided by an international organization                                                                                                | Institutional source                                                                                                                                                                                                                                                                                                                                            | Notes                                                  |
|------------|-------------------------------------------------------------------------------------------------------------------------------------------------------------------------------------------------------------------------------|-------------------------------------------------------------------------------------------------------------------------------------------------|-----------------------------------------------------------------------------------------------------------------------------------------------------------------------------------------------------------------------------------------------------------------------------------------------------------------------------------------------------------------|--------------------------------------------------------|
| Argentina  | <a href="https://www.argentina.gob.ar/salud/investigaciones/comites">https://www.argentina.gob.ar/salud/investigaciones/comites</a>                                                                                           | Not found                                                                                                                                       | <a href="https://med.unne.edu.ar/institucional/gestion-academica-y-administrativa/secretaria-de-ciencia-y-tecnologia/comite-de-bioetica-en-investigacion-de-ciencias-de-la-salud/">https://med.unne.edu.ar/institucional/gestion-academica-y-administrativa/secretaria-de-ciencia-y-tecnologia/comite-de-bioetica-en-investigacion-de-ciencias-de-la-salud/</a> |                                                        |
|            | <a href="https://buenosaires.gob.ar/sites/default/files/2023-09/Lista_nueva_cei_efectores_no_gcba_4-sep-2023.pdf">https://buenosaires.gob.ar/sites/default/files/2023-09/Lista_nueva_cei_efectores_no_gcba_4-sep-2023.pdf</a> |                                                                                                                                                 |                                                                                                                                                                                                                                                                                                                                                                 |                                                        |
|            | <a href="https://www.argentina.gob.ar/sites/default/files/2022/06/listado_comites_acreditados_8-7-2022.pdf">https://www.argentina.gob.ar/sites/default/files/2022/06/listado_comites_acreditados_8-7-2022.pdf</a>             |                                                                                                                                                 |                                                                                                                                                                                                                                                                                                                                                                 |                                                        |
| Bahrain    | Not found                                                                                                                                                                                                                     | Not found                                                                                                                                       | <a href="https://www.rcsi.com/bahrain/research/research-ethics-committee">https://www.rcsi.com/bahrain/research/research-ethics-committee</a>                                                                                                                                                                                                                   |                                                        |
| Bangladesh | Not found                                                                                                                                                                                                                     | <a href="https://healthresearchwebafrica.org.za/en/bangladesh/institution">https://healthresearchwebafrica.org.za/en/bangladesh/institution</a> | Not found                                                                                                                                                                                                                                                                                                                                                       |                                                        |
| Belgium    | <a href="https://www.famhp.be/sites/default/files/Lijst%20EC's%20-%20Liste%20CE_1.pdf">https://www.famhp.be/sites/default/files/Lijst%20EC's%20-%20Liste%20CE_1.pdf</a>                                                       | Not found                                                                                                                                       | Not found                                                                                                                                                                                                                                                                                                                                                       |                                                        |
| Brazil     | <a href="https://plataformabrasil.saude.gov.br/login.jsf">https://plataformabrasil.saude.gov.br/login.jsf</a>                                                                                                                 | Not found                                                                                                                                       | Not found                                                                                                                                                                                                                                                                                                                                                       | CONEP= Brazilian committee of ethics in Human Research |
| Chile      | Not found                                                                                                                                                                                                                     | Not found                                                                                                                                       | <a href="https://eticayseguridad.uc.cl/images/D.R._143-2020._Regulation_of_the_scientific_ethics_committee_of_health_UC_-_English.pdf">https://eticayseguridad.uc.cl/images/D.R._143-2020._Regulation_of_the_scientific_ethics_committee_of_health_UC_-_English.pdf</a>                                                                                         |                                                        |
| China      | Not found                                                                                                                                                                                                                     | <a href="https://www.aahrpp.org/find-an-accredited-organization">https://www.aahrpp.org/find-an-accredited-organization</a>                     | Not found                                                                                                                                                                                                                                                                                                                                                       |                                                        |
| Colombia   | <a href="https://aciccolombia.org/lista-de-comites-de-etica-en-colombia/">https://aciccolombia.org/lista-de-comites-de-etica-en-colombia/</a>                                                                                 | <a href="https://healthresearchwebafrica.org.za/en/colombia/institution">https://healthresearchwebafrica.org.za/en/colombia/institution</a>     | Not found                                                                                                                                                                                                                                                                                                                                                       | National source not used                               |
| Ecuador    | Not found                                                                                                                                                                                                                     | Not found                                                                                                                                       | <a href="https://www.usfq.edu.ec/en/human-research-ethics-committee-ceish">https://www.usfq.edu.ec/en/human-research-ethics-committee-ceish</a>                                                                                                                                                                                                                 |                                                        |
| Egypt      | <a href="http://www.enrec.org/directory">http://www.enrec.org/directory</a>                                                                                                                                                   | Not found                                                                                                                                       | Not found                                                                                                                                                                                                                                                                                                                                                       |                                                        |

|           |                                                                                                                                                                                                                                                                         |                                                                                                                                     |                                                                                                     |                                                                                                                                                                                                                                                                                          |
|-----------|-------------------------------------------------------------------------------------------------------------------------------------------------------------------------------------------------------------------------------------------------------------------------|-------------------------------------------------------------------------------------------------------------------------------------|-----------------------------------------------------------------------------------------------------|------------------------------------------------------------------------------------------------------------------------------------------------------------------------------------------------------------------------------------------------------------------------------------------|
|           |                                                                                                                                                                                                                                                                         |                                                                                                                                     |                                                                                                     |                                                                                                                                                                                                                                                                                          |
| France    | <a href="http://urcest.com/les-cpp-en-ile-de-france">http://urcest.com/les-cpp-en-ile-de-france</a>                                                                                                                                                                     | Not found                                                                                                                           | Not found                                                                                           |                                                                                                                                                                                                                                                                                          |
|           | <a href="http://cppouest1.fr/mediawiki/index.php?title=Accueil">http://cppouest1.fr/mediawiki/index.php?title=Accueil</a>                                                                                                                                               |                                                                                                                                     |                                                                                                     |                                                                                                                                                                                                                                                                                          |
| Germany   | <a href="https://www.bfarm.de/DE/Medizinprodukte/Ueberblick/Institutionen/Ethikkommissionen/_node.html">https://www.bfarm.de/DE/Medizinprodukte/Ueberblick/Institutionen/Ethikkommissionen/_node.html</a>                                                               | Not found                                                                                                                           | Not found                                                                                           |                                                                                                                                                                                                                                                                                          |
| Greece    | Not found                                                                                                                                                                                                                                                               | <a href="http://www.eurecnet.org/information/greece.html">http://www.eurecnet.org/information/greece.html</a>                       | Not found                                                                                           |                                                                                                                                                                                                                                                                                          |
| India     | <a href="https://cdsco.gov.in/opencms/export/sites/CDSCO_WEB/Pdf-documents/list-ofecommittee2022.pdf">https://cdsco.gov.in/opencms/export/sites/CDSCO_WEB/Pdf-documents/list-ofecommittee2022.pdf</a>                                                                   | Not found                                                                                                                           | Not found                                                                                           |                                                                                                                                                                                                                                                                                          |
|           | <a href="https://cdsco.gov.in/opencms/opencms/en/Clinical-Trial/Ethics-Committee/Ethics-Committee-Registration/">https://cdsco.gov.in/opencms/opencms/en/Clinical-Trial/Ethics-Committee/Ethics-Committee-Registration/</a>                                             |                                                                                                                                     |                                                                                                     |                                                                                                                                                                                                                                                                                          |
|           | <a href="https://www.ncdirindia.org/All_Committee.html">https://www.ncdirindia.org/All_Committee.html</a>                                                                                                                                                               |                                                                                                                                     |                                                                                                     |                                                                                                                                                                                                                                                                                          |
| Indonesia | Not found                                                                                                                                                                                                                                                               | <a href="https://www.ncdirindia.org/All_Committee.html">https://www.ncdirindia.org/All_Committee.html</a>                           | Not found                                                                                           | official website of National Institute of Health Research and Development on 07.02.24 not available, <a href="https://health-policy-systems.biomedcentral.com/articles/10.1186/s12961-015-0024-9">https://health-policy-systems.biomedcentral.com/articles/10.1186/s12961-015-0024-9</a> |
| Iran      | Not found                                                                                                                                                                                                                                                               | <a href="https://healthresearchwebafrica.org.za/en/iran/institution">https://healthresearchwebafrica.org.za/en/iran/institution</a> | Not found                                                                                           |                                                                                                                                                                                                                                                                                          |
| Iraq      | Not found                                                                                                                                                                                                                                                               | Not found                                                                                                                           | Not found                                                                                           | Source not found                                                                                                                                                                                                                                                                         |
| Israel    | Not found                                                                                                                                                                                                                                                               | Not found                                                                                                                           | <a href="https://rnd.sheba.co.il/Research_Authority">https://rnd.sheba.co.il/Research_Authority</a> | Link no longer available (last visited 07.2023)                                                                                                                                                                                                                                          |
| Italy     | <a href="https://www.aifa.gov.it/documents/20142/1123276/Comunicazione_gestione_studi_clinici_in_emergenza_COVID-19-EN_17.09.2020.pdf">https://www.aifa.gov.it/documents/20142/1123276/Comunicazione_gestione_studi_clinici_in_emergenza_COVID-19-EN_17.09.2020.pdf</a> | Not found                                                                                                                           | Not found                                                                                           |                                                                                                                                                                                                                                                                                          |
| Mexico    | <a href="https://www.gob.mx/cms/uploads/attachment/file/801449/Registros_CEI.01022023.pdf">https://www.gob.mx/cms/uploads/attachment/file/801449/Registros_CEI.01022023.pdf</a>                                                                                         | Not found                                                                                                                           | Not found                                                                                           |                                                                                                                                                                                                                                                                                          |

|                        |                                                                                                                                                                                                                                                                                 |                                                                                                                             |                                                                                                                                                               |                  |
|------------------------|---------------------------------------------------------------------------------------------------------------------------------------------------------------------------------------------------------------------------------------------------------------------------------|-----------------------------------------------------------------------------------------------------------------------------|---------------------------------------------------------------------------------------------------------------------------------------------------------------|------------------|
| <b>Nigeria</b>         | <a href="https://nhrec.net/registered-health-research-ethics-committees-in-nigeria-hrec/">https://nhrec.net/registered-health-research-ethics-committees-in-nigeria-hrec/</a>                                                                                                   | Not found                                                                                                                   | Not found                                                                                                                                                     |                  |
| <b>Norway</b>          | <a href="https://rekportalen.no/#omrek/REK">https://rekportalen.no/#omrek/REK</a>                                                                                                                                                                                               | Not found                                                                                                                   | Not found                                                                                                                                                     |                  |
| <b>Oman</b>            | Not found                                                                                                                                                                                                                                                                       | Not found                                                                                                                   | <a href="https://royalhospital.med.om/pdf/RH-Research-Policy.pdf">https://royalhospital.med.om/pdf/RH-Research-Policy.pdf</a>                                 |                  |
| <b>Pakistan</b>        | <a href="nbcPakistan.org.pk/assets/list_of_ercin_publicprivatemedicalcolleges.docx">nbcPakistan.org.pk/assets/list_of_ercin_publicprivatemedicalcolleges.docx</a>                                                                                                               | Not found                                                                                                                   | Not found                                                                                                                                                     |                  |
| <b>Qatar</b>           | Not found                                                                                                                                                                                                                                                                       | Not found                                                                                                                   | <a href="https://www.hamad.qa/EN/About-Us/Our-Accreditations/Pages/default.aspx#">https://www.hamad.qa/EN/About-Us/Our-Accreditations/Pages/default.aspx#</a> |                  |
| <b>Russia</b>          | Not found                                                                                                                                                                                                                                                                       | Not found                                                                                                                   | Not found                                                                                                                                                     | Source not found |
| <b>Saudi Arabia</b>    | <a href="https://www.moh.gov.sa/en/Ministry/MediaCenter/Publications/Pages/Annual-Research-Report-2016.pdf">https://www.moh.gov.sa/en/Ministry/MediaCenter/Publications/Pages/Annual-Research-Report-2016.pdf</a>                                                               | Not found                                                                                                                   | Not found                                                                                                                                                     |                  |
| <b>Singapore</b>       | Not found                                                                                                                                                                                                                                                                       | <a href="https://www.aahrpp.org/find-an-accredited-organization">https://www.aahrpp.org/find-an-accredited-organization</a> | Not found                                                                                                                                                     |                  |
| <b>South Africa</b>    | <a href="https://www.health.gov.za/wp-content/uploads/2022/05/NHREC-Registration-List-of-Human-RECs-Animal-RECs-registered-with-NHREC.pdf">https://www.health.gov.za/wp-content/uploads/2022/05/NHREC-Registration-List-of-Human-RECs-Animal-RECs-registered-with-NHREC.pdf</a> | Not found                                                                                                                   | Not found                                                                                                                                                     |                  |
| <b>South Korea</b>     | Not found                                                                                                                                                                                                                                                                       | <a href="https://www.aahrpp.org/find-an-accredited-organization">https://www.aahrpp.org/find-an-accredited-organization</a> | Not found                                                                                                                                                     |                  |
| <b>Spain</b>           | <a href="https://www.aemps.gob.es/medicamentos-de-uso-humano/investigacion_medicamentos/investigacion_clinica_ceim/">https://www.aemps.gob.es/medicamentos-de-uso-humano/investigacion_medicamentos/investigacion_clinica_ceim/</a>                                             | Not found                                                                                                                   | Not found                                                                                                                                                     |                  |
| <b>Sweden</b>          | <a href="https://etikprovningssmyndigheten.se/en/">https://etikprovningssmyndigheten.se/en/</a>                                                                                                                                                                                 | Not found                                                                                                                   | Not found                                                                                                                                                     |                  |
| <b>Taiwan</b>          | <a href="https://www.taiwanclinicaltrials.tw/spotlight/clinical_trial_overview/c_IRB/introduce">https://www.taiwanclinicaltrials.tw/spotlight/clinical_trial_overview/c_IRB/introduce</a>                                                                                       | Not found                                                                                                                   | Not found                                                                                                                                                     |                  |
| <b>The Netherlands</b> | <a href="https://english.ccmo.nl/mrecs/accredited-mrecs">https://english.ccmo.nl/mrecs/accredited-mrecs</a>                                                                                                                                                                     | Not found                                                                                                                   | Not found                                                                                                                                                     |                  |
| <b>Turkey</b>          | <a href="https://www.titck.gov.tr/dinamikmodul/84">https://www.titck.gov.tr/dinamikmodul/84</a>                                                                                                                                                                                 | Not found                                                                                                                   | Not found                                                                                                                                                     |                  |

|           |                                                                                                                                                                                                                               |                                                                                                                                         |           |                             |
|-----------|-------------------------------------------------------------------------------------------------------------------------------------------------------------------------------------------------------------------------------|-----------------------------------------------------------------------------------------------------------------------------------------|-----------|-----------------------------|
| Uganda    | Not found                                                                                                                                                                                                                     | <a href="https://healthresearchwebafrica.org.za/en/uganda/institution">https://healthresearchwebafrica.org.za/en/uganda/institution</a> | Not found |                             |
| UK        | <a href="https://www.hra.nhs.uk/about-us/committees-and-services/res-and-recs/search-research-ethics-committees/">https://www.hra.nhs.uk/about-us/committees-and-services/res-and-recs/search-research-ethics-committees/</a> | Not found                                                                                                                               | Not found |                             |
| USA       | <a href="https://ohrp.cit.nih.gov/search/irbsearch.aspx">https://ohrp.cit.nih.gov/search/irbsearch.aspx</a>                                                                                                                   | Not found                                                                                                                               | Not found |                             |
| Multisite | N/A                                                                                                                                                                                                                           | <a href="https://www.who.int/groups/research-ethics-review-committee">https://www.who.int/groups/research-ethics-review-committee</a>   | N/A       | WHO ethics review committee |
