# Supplementary material
Source: HighWire-hosted journal article supplement (https://bmjopen.bmj.com/content/15/3/e092244)
Supplement: inline-supplementary-material-4 [file inline-supplementary-material-4.pdf]

**Additional File 4: Ethics approval date reported in trial registry records. (n = 74)<sup>a</sup>**

| <b>Published RCTs</b>           | <b>Registered on</b> | <b>EA Date identified on</b> |
|---------------------------------|----------------------|------------------------------|
| <b>ACTIV-3/TICO-2021b</b>       | NCT, EUCTR           | EUCTR                        |
| <b>Ader-2021</b>                | NCT, EUCTR           | EUCTR                        |
| <b>Ader-2022</b>                | NCT, EUCTR           | EUCTR                        |
| <b>Agarwal-2020</b>             | CTRI                 | CTRI                         |
| <b>Babalola-2022</b>            | ISRCTN               | ISRCTN                       |
| <b>Baldeón-2022</b>             | ISRCTN               | ISRCTN                       |
| <b>Butler-2021 (PRINCIPLE)</b>  | ISRCTN, EUCTR        | ISRCTN, EUCTR                |
| <b>Caricchio-2021</b>           | NCT, EUCTR           | EUCTR                        |
| <b>Chaccour-2021</b>            | NCT, EUCTR           | EUCTR                        |
| <b>Chen-2020b</b>               | ChiCTR               | ChiCTR                       |
| <b>Chen-2020c</b>               | ChiCTR               | ChiCTR                       |
| <b>CORIMUNO-2021</b>            | NCT, EUCTR           | EUCTR                        |
| <b>CORIMUNO-2022</b>            | NCT, EUCTR           | EUCTR                        |
| <b>Corral-Gudino-2021</b>       | EUCTR, REec          | EUCTR                        |
| <b>Davoodi-2020</b>             | IRCT                 | IRCT                         |
| <b>Declercq-2021</b>            | NCT, EUCTR           | EUCTR                        |
| <b>Deftereos-2020</b>           | NCT, EUCTR           | EUCTR                        |
| <b>Dequin-2020</b>              | NCT, EUCTR           | EUCTR                        |
| <b>Dorward-2022 (PRINCIPLE)</b> | ISRCTN, EUCTR        | ISRCTN, EUCTR                |
| <b>Dubée-2020</b>               | NCT, EUCTR           | EUCTR                        |
| <b>Edalatifard-2020</b>         | IRCT                 | IRCT                         |
| <b>Entrenas Castillo-2020</b>   | NCT, EUCTR           | EUCTR                        |
| <b>Eom-2021</b>                 | NCT, EUCTR           | EUCTR                        |
| <b>Farahani-2020</b>            | IRCT                 | IRCT                         |
| <b>Ghaderkhani-2020</b>         | IRCT                 | IRCT                         |
| <b>Gupta-2021a, COMET-ICE</b>   | NCT, EUCTR           | EUCTR                        |
| <b>Gupta-2021b, COMET-ICE</b>   | NCT, EUCTR           | EUCTR                        |
| <b>Hermine-2021</b>             | NCT, EUCTR           | EUCTR                        |
| <b>Hinks-2021</b>               | NCT, EUCTR           | EUCTR                        |
| <b>Huang-2020</b>               | ChiCTR               | ChiCTR                       |
| <b>Jamaati-2021</b>             | IRCT                 | IRCT                         |

|                              |                    |               |
|------------------------------|--------------------|---------------|
| <b>Karakike-2021</b>         | NCT, EUCTR         | EUCTR         |
| <b>Kharazmi-2022</b>         | IRCT               | IRCT          |
| <b>Kirti-2021</b>            | CTRI               | CTRI          |
| <b>Körper-2021</b>           | NCT, EUCTR         | EUCTR         |
| <b>Kyriazopoulou-2021</b>    | NCT, EUCTR         | EUCTR         |
| <b>Lescure-2021</b>          | NCT, EUCTR         | EUCTR         |
| <b>Li-2020</b>               | ChiCTR             | ChiCTR        |
| <b>Li-2021</b>               | ChiCTR (3x)        | ChiCTR        |
| <b>Merchante-2022</b>        | NCT, EUCTR, REec   | EUCTR         |
| <b>Mitjà-2020a</b>           | NCT, EUCTR         | EUCTR         |
| <b>Mitjà-2020b</b>           | NCT, EUCTR         | EUCTR         |
| <b>Mitjà-2020c</b>           | NCT, EUCTR         | EUCTR         |
| <b>Niaee-2021</b>            | IRCT               | IRCT          |
| <b>O'Brien-2022</b>          | NCT, EUCTR         | EUCTR         |
| <b>Pan-2020 (SOLIDARITY)</b> | NCT, ISRCT         | ISRCTN        |
| <b>Pouladzadeh-2021</b>      | IRCT               | IRCT          |
| <b>PRINCIPLE-2021</b>        | ISRCTN, EUCTR      | ISRCTN, EUCTR |
| <b>Ranjbar-2021</b>          | IRCT               | IRCT          |
| <b>RECOVERY-2020a</b>        | ISRCTN, EUCTR, NCT | ISRCTN, EUCTR |
| <b>RECOVERY-2020b</b>        | ISRCTN, EUCTR, NCT | ISRCTN, EUCTR |
| <b>RECOVERY-2021a</b>        | ISRCTN, EUCTR, NCT | ISRCTN, EUCTR |
| <b>RECOVERY-2021b</b>        | ISRCTN, EUCTR, NCT | ISRCTN, EUCTR |
| <b>RECOVERY-2021c</b>        | ISRCTN, EUCTR, NCT | ISRCTN, EUCTR |
| <b>RECOVERY-2021d</b>        | ISRCTN, EUCTR, NCT | ISRCTN, EUCTR |
| <b>RECOVERY-2022</b>         | ISRCTN, EUCTR, NCT | ISRCTN, EUCTR |
| <b>Rosas-2021a</b>           | NCT, EUCTR         | EUCTR         |
| <b>Rosas-2021b</b>           | NCT, EUCTR         | EUCTR         |
| <b>Salama-2021</b>           | NCT, EUCTR         | EUCTR         |
| <b>Salehzadeh-2020</b>       | IRCT               | IRCT          |

|                                     |                    |               |
|-------------------------------------|--------------------|---------------|
| <b>Salvarani-2021</b>               | NCT, EUCTR         | EUCTR         |
| <b>Sancho-López-2021</b>            | EUCTR              | EUCTR         |
| <b>Sekhavati-2020</b>               | IRCT               | IRCT          |
| <b>Shahbaznejad-2021</b>            | IRCT               | IRCT          |
| <b>Sivapalan-2021</b>               | NCT, EUCTR         | EUCTR         |
| <b>Somersan-Karakaya-2022</b>       | NCT, EUCTR         | EUCTR         |
| <b>Spinner-2020</b>                 | ISRCTN, EUCTR, NCT | ISRCTN, EUCTR |
| <b>Tang-2020</b>                    | ChiCTR             | ChiCTR        |
| <b>Tardif-2021</b>                  | NCT, EUCTR         | EUCTR         |
| <b>Wang-2020a</b>                   | ChiCTR             | ChiCTR        |
| <b>Weinreich-2021a, (phase 1-2)</b> | NCT, EUCTR         | EUCTR         |
| <b>Weinreich-2021b, (phase 1-2)</b> | NCT, EUCTR         | EUCTR         |
| <b>Weinreich-2021c, (phase 3)</b>   | NCT, EUCTR         | EUCTR         |
| <b>Yu-2021b (PRINCIPLE)</b>         | ISRCTN, EUCTR      | ISRCTN, EUCTR |

Footnotes:

\* Unpublished study, EA date reported on the trial registry record.

<sup>a</sup> n = 74 published RCTs, several RCTs were registered more than once and/or in different registries.
